# Supplementary material
Source: bioRxiv or medRxiv preprint supplement (https://medrxiv.org/highwire/filestream/93114/field_highwire_adjunct_files/1/2020.08.11.20172809-2.pdf)

# Supplemental Figure 1: Effect of Noise on MLP Federated Model Performance by Site.

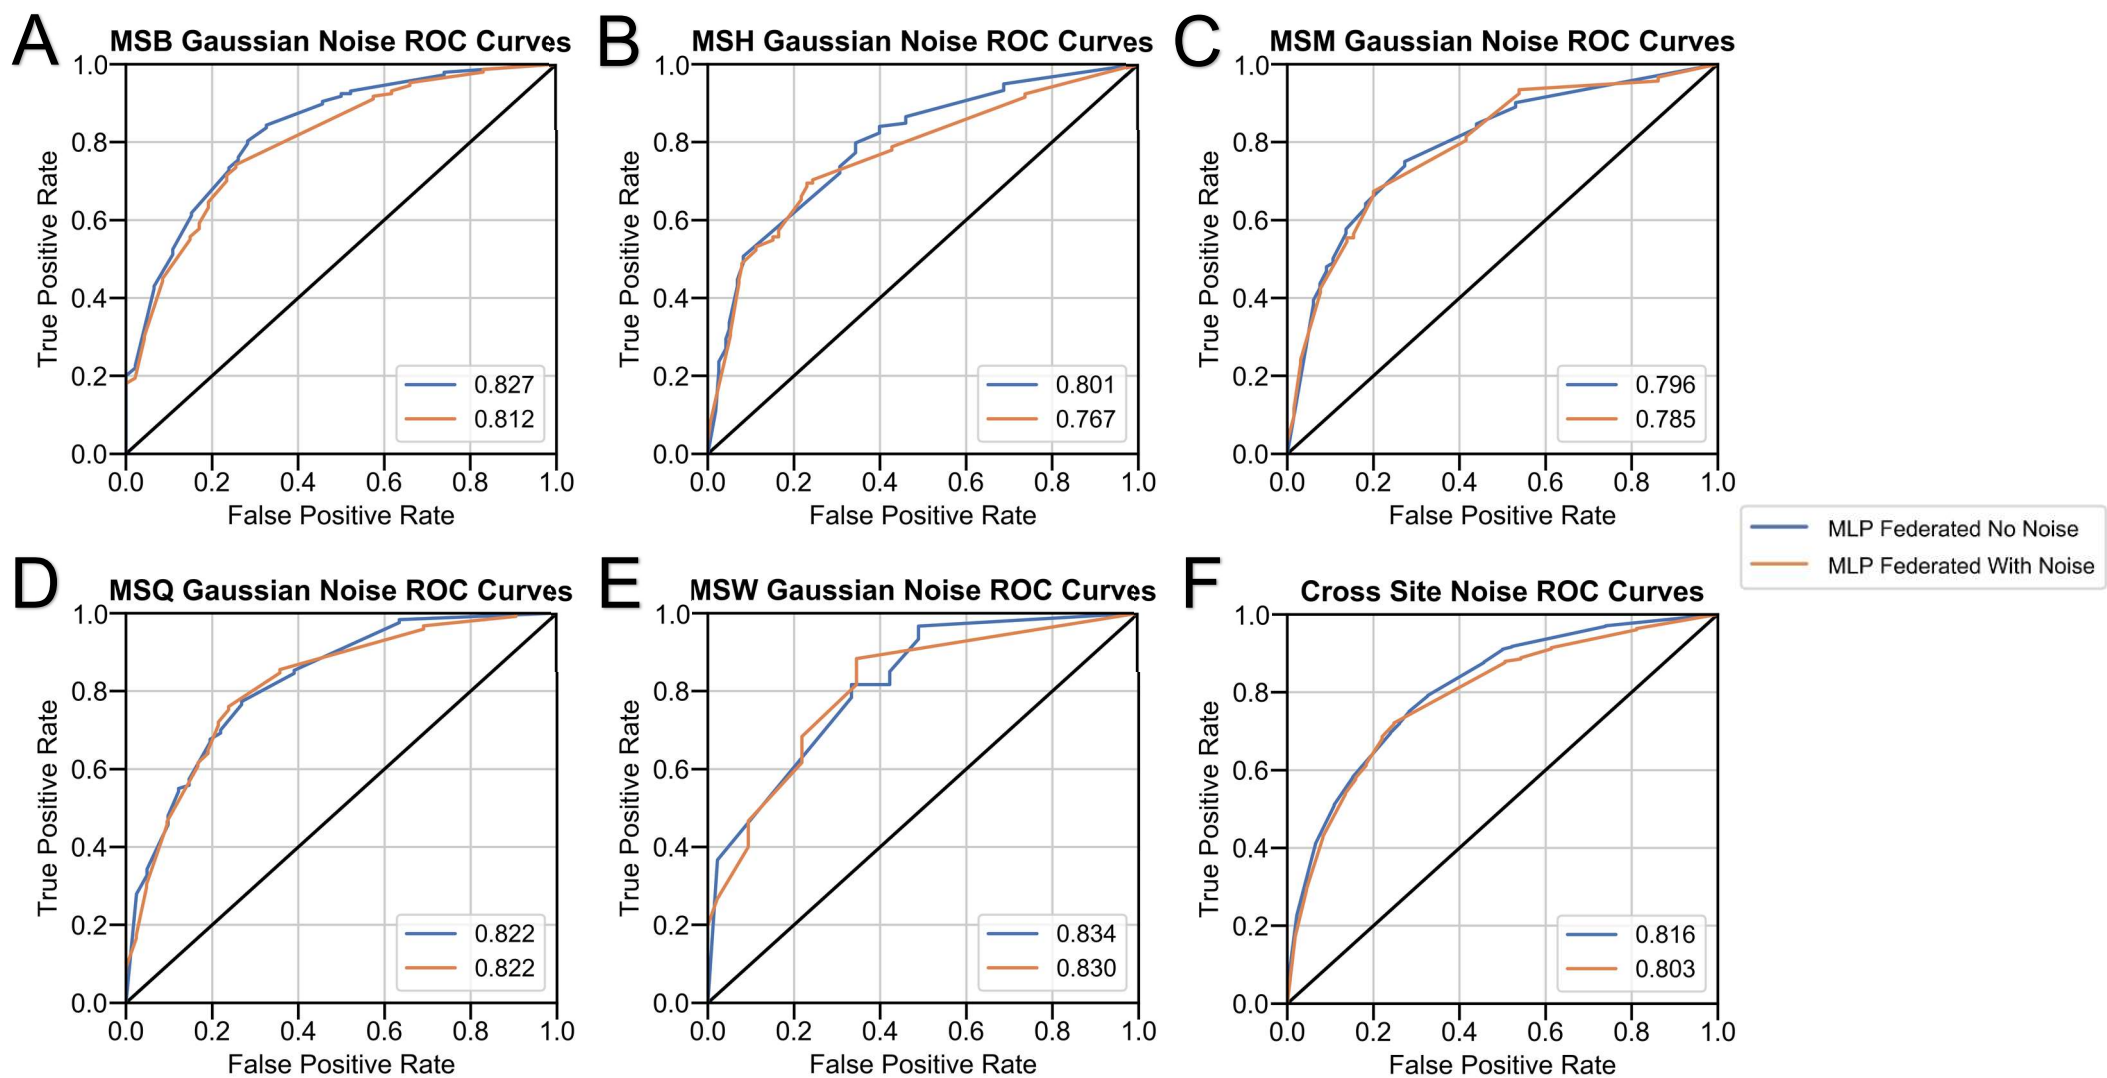

Supplement: Supplementary file [file 2020.08.11.20172809-2.pdf]
